# Supplementary material
Source: PubMed Central journal article supplement (PMC4859582)
Supplement: JB.00718-15_zjb999093992so1.pdf [file JB.00718-15_zjb999093992so1.pdf]

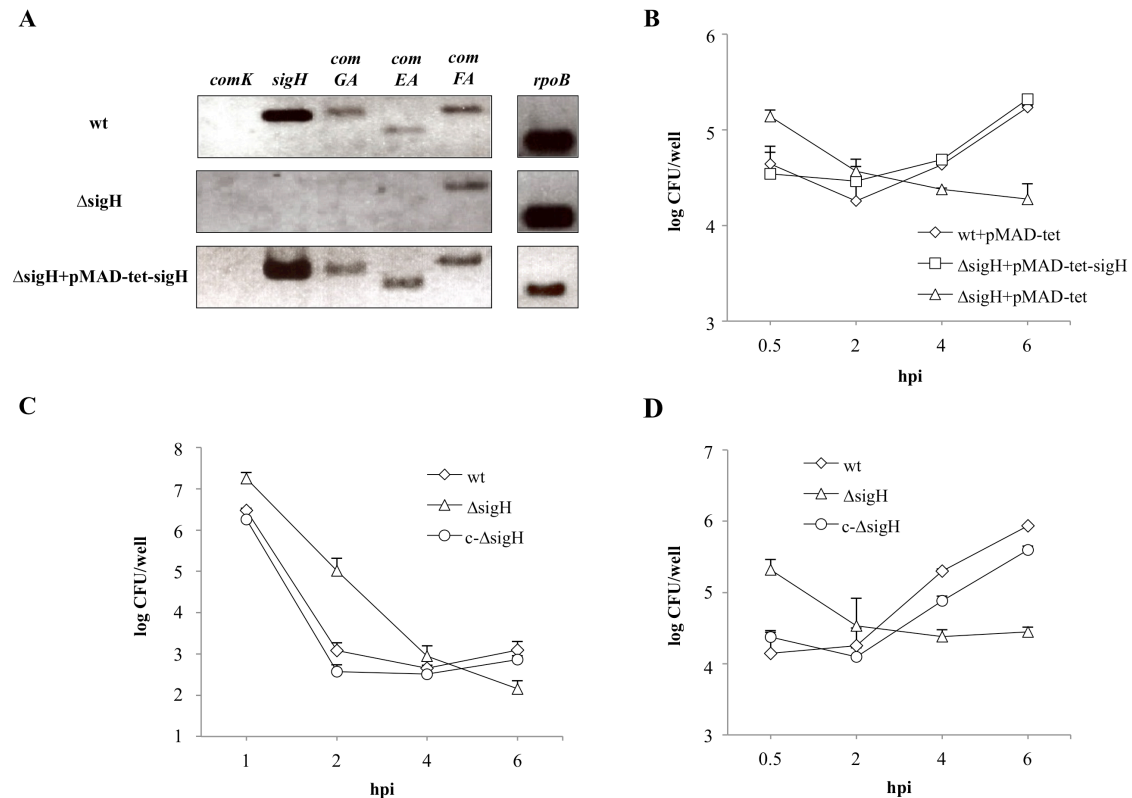

**Fig. S1** Complementation of *sigH*. **A**. Semi-quantitative RT-PCR of *comK*, *sigH*, *comGA*, *comEA*, and *comFA* genes. wt: phage-cured EGDe strain;  $\Delta sigH$ : *sigH* deletion strain;  $\Delta sigH+pMAD-tet-sigH$ : *sigH* deletion strain complemented with pMAD-tet-*sigH*. Sampling point is shown in Fig. 2. A representative result is shown from 3 independent experiments. The *sigH* complementation restored the expression of *comGA*, *comEA*. **B**. Intracellular growth in RAW 264.7 macrophages. wt+pMAD-tet: phage-cured EGDe strain carrying pMAD-tet;  $\Delta sigH+pMAD-tet$ : *sigH* deletion strain carrying pMAD-tet;  $\Delta sigH+pMAD-tet-sigH$ : *sigH* deletion strain complemented with pMAD-tet-*sigH*. Means of 3 independent experiments are shown. The *sigH* complementation restored the intracellular growth in macrophages. **C**. Intracellular growth in HeLa cells. We noted that cells carrying pMAD-tet or pMAD-tet-*sigH* exhibited heterogeneous colony size after the passage through HeLa cells due to unknown reasons. Therefore, we used a chromosomally complemented strain, c- $\Delta sigH$ . wt: phage-cured EGDe strain;  $\Delta sigH$ : *sigH* deletion strain; c- $\Delta sigH$ : *sigH* chromosomal complementation of  $\Delta sigH$ . c- $\Delta sigH$  recovered the growth deficiency in HeLa cells, confirming that the disruption of the *sigH* locus leads to the growth deficiency. Means of at least 2 independent experiments are shown. **D**. Intracellular growth on RAW264.7 cells. Strains are the same as in C. In line with the plasmid-complemented strain ( $\Delta sigH+pMAD-tet-sigH$ ), the chromosomally cured c- $\Delta sigH$  also recovered the intracellular growth in macrophages. Means of at least 2 independent experiments are shown.
